# Supplementary material for: National trends in rheumatoid arthritis and osteoarthritis prevalence in South Korea, 1998–2021
Source: PubMed Central journal article supplement (PMC10636038; doi:10.1038/s41598-023-46279-6), 2023-11-09
Supplement: 41598_2023_46279_MOESM1_ESM.pdf [file 41598_2023_46279_MOESM1_ESM.pdf]

Original Article

**National trends in rheumatoid arthritis and osteoarthritis prevalence in South Korea from, 1998 to 2021**

Running title: **Rheumatoid arthritis and osteoarthritis in South Korea**

Jaeyu Park,<sup>1,2</sup> Myeongcheol Lee,<sup>1,2</sup> Hojae Lee,<sup>1,2</sup> Hyeon Jin Kim,<sup>1,2</sup> Rosie Kwon,<sup>1,2</sup> Hwi Yang,<sup>1,2</sup> Seung Won Lee,<sup>3</sup> Sunyoung Kim,<sup>4</sup> Masoud Rahmati,<sup>5</sup> Ai Koyanagi,<sup>6,7</sup> Lee Smith,<sup>8</sup> Min Seo Kim,<sup>9</sup> Louis Jacob,<sup>6,7,10,11</sup> Guillermo F López Sánchez,<sup>12</sup> Dragioti Elena,<sup>13,14</sup> Jae Il Shin,<sup>15</sup> Sang Youl Rhee,<sup>2,16</sup> Myung Chul Yoo,<sup>17\*</sup> Dong Keon Yon<sup>1,2,18\*</sup>

**\*Corresponding authors**

**Dong Keon Yon, MD, FACAAI, FAAAAI**

Department of Pediatrics, Kyung Hee University Medical Center, Kyung Hee University College of Medicine, 23 Kyungheedaero, Dongdaemun-gu, Seoul 02447, South Korea

Email: yonkkang@gmail.com

**Myung Chul Yoo, MD, PhD**

Department of Rehabilitation Medicine, Kyung Hee University Medical Center, Kyung Hee University College of Medicine, 23 Kyungheedaero, Dongdaemun-gu, Seoul 02447, South Korea

Email: famousir@naver.com

**Table S1.** National trends of the prevalence of RA and OA before and during the COVID-19 pandemic, weighted % (95% CI), in the data obtained from the KNHANES

| Year                   | Pre-pandemic (1998-2019) | During the pandemic    |                        |
|------------------------|--------------------------|------------------------|------------------------|
|                        |                          | 2020                   | 2021                   |
| RA and OA              |                          |                        |                        |
| Overall                | 9.74 (9.53 to 9.95)      | 8.91 (8.00 to 9.82)    | 9.27 (8.31 to 10.24)   |
| Age group              |                          |                        |                        |
| Age (19–60 years)      | 4.66 (4.50 to 4.83)      | 2.87 (2.28 to 3.46)    | 3.46 (2.81 to 4.11)    |
| Age ( $\geq 60$ years) | 29.02 (28.44 to 29.60)   | 24.72 (22.58 to 26.85) | 23.49 (21.27 to 25.71) |
| Sex                    |                          |                        |                        |
| Male                   | 4.33 (4.14 to 4.52)      | 4.08 (3.31 to 4.86)    | 4.74 (3.83 to 5.64)    |
| Female                 | 15.02 (14.68 to 15.36)   | 13.71 (12.19 to 15.23) | 13.77 (12.28 to 15.27) |
| Region of residence    |                          |                        |                        |
| Urban                  | 8.72 (8.50 to 8.94)      | 8.68 (7.69 to 9.66)    | 8.49 (7.50 to 9.48)    |

|                                 |                        |                        |                        |
|---------------------------------|------------------------|------------------------|------------------------|
| Rural                           | 14.37 (13.67 to 15.06) | 10.19 (7.34 to 13.05)  | 13.32 (10.61 to 16.02) |
| <b>BMI group</b>                |                        |                        |                        |
| Underweight                     | 4.38 (3.70 to 5.06)    | 3.49 (1.03 to 5.95)    | 4.78 (2.20 to 7.36)    |
| Normal weight and overweight    | 8.40 (8.13 to 8.68)    | 8.29 (7.19 to 9.38)    | 8.24 (7.16 to 9.33)    |
| Obesity                         | 12.91 (12.47 to 13.35) | 10.14 (8.66 to 11.61)  | 10.96 (9.43 to 12.49)  |
| <b>Education</b>                |                        |                        |                        |
| High school or lower education  | 15.75 (15.42 to 16.08) | 17.27 (15.71 to 18.84) | 16.33 (14.59 to 18.06) |
| College or higher education     | 2.50 (2.33 to 2.66)    | 2.94 (2.21 to 3.66)    | 3.96 (3.19 to 4.74)    |
| <b>Income</b>                   |                        |                        |                        |
| Income (lowest-second quartile) | 14.77 (14.40 to 15.15) | 14.44 (12.78 to 16.09) | 15.49 (13.66 to 17.32) |
| Income (third-highest quartile) | 6.06 (5.86 to 6.27)    | 5.64 (4.82 to 6.46)    | 5.64 (4.81 to 6.46)    |

Abbreviations: CI, confidence interval; KNHANES, Korea National Health and Nutrition Examination Survey; OA, osteoarthritis; OR, odds ratio; RA, rheumatoid arthritis.

**Table S2.** National trend of the RA and OA prevalence and  $\beta$ -coefficients of the odds ratios before and during the COVID-19 pandemic, weighted % (95% CI), in the data obtained from the KNHANES

| Year      | Pre-pandemic                 |                                 |                                |                              |                              |                               | During the pandemic          |                               | Trends in the pre-pandemic era, $\beta$ (95% CI) | Trends in the pandemic era, $\beta$ (95% CI) | $\beta_{diff}$ between 2005-2019 and 2019-2021 (95% CI) | Weighted odds of before and during the pandemic, OR (95% CI) |                              |
|-----------|------------------------------|---------------------------------|--------------------------------|------------------------------|------------------------------|-------------------------------|------------------------------|-------------------------------|--------------------------------------------------|----------------------------------------------|---------------------------------------------------------|--------------------------------------------------------------|------------------------------|
|           | 1998-2001                    | 2005-2007                       | 2008-2010                      | 2011-2013                    | 2014-2016                    | 2017-2019                     | 2020                         | 2021                          |                                                  |                                              |                                                         | 2020 versus 2017–2019 (reference)                            | 2021 versus 2020 (reference) |
| RA and OA |                              |                                 |                                |                              |                              |                               |                              |                               |                                                  |                                              |                                                         |                                                              |                              |
| Overall   | 9.30<br>(8.79<br>to<br>9.81) | 11.36<br>(10.87<br>to<br>11.85) | 10.10<br>(9.58<br>to<br>10.61) | 9.03<br>(8.53<br>to<br>9.53) | 9.13<br>(8.61<br>to<br>9.65) | 9.54<br>(9.00<br>to<br>10.07) | 8.91<br>(8.00<br>to<br>9.82) | 9.27<br>(8.31<br>to<br>10.24) | <b>-0.247 (-0.375<br/>to -0.119)</b>             | -0.131 (-0.695<br>to 0.433)                  | 0.116 (-0.463<br>to 0.694)                              | 0.93 (0.81<br>to 1.06)                                       | 1.05 (0.88<br>to 1.24)       |
| Age group |                              |                                 |                                |                              |                              |                               |                              |                               |                                                  |                                              |                                                         |                                                              |                              |

|                   |                                 |                                 |                                 |                                 |                                 |                                 |                                 |                                 |                                      |                                      |                                   |                                |                        |
|-------------------|---------------------------------|---------------------------------|---------------------------------|---------------------------------|---------------------------------|---------------------------------|---------------------------------|---------------------------------|--------------------------------------|--------------------------------------|-----------------------------------|--------------------------------|------------------------|
| Age (19–60 years) | 4.92<br>(4.56<br>to<br>5.28)    | 6.17<br>(5.78<br>to<br>6.55)    | 5.28<br>(4.88<br>to<br>5.69)    | 4.10<br>(3.68<br>to<br>4.52)    | 4.08<br>(3.68<br>to<br>4.48)    | 3.66<br>(3.29<br>to<br>4.03)    | 2.87<br>(2.28<br>to<br>3.46)    | 3.46<br>(2.81<br>to<br>4.11)    | <b>-0.448 (-0.540<br/>to -0.356)</b> | -0.101 (-0.470<br>to 0.267)          | 0.347 (-0.033<br>to 0.726)        | <b>0.78 (0.61<br/>to 0.98)</b> | 1.22 (0.92<br>to 1.61) |
| Age (≥60 years)   | 30.80<br>(29.16<br>to<br>32.43) | 37.52<br>(35.95<br>to<br>39.08) | 30.20<br>(28.85<br>to<br>31.54) | 27.52<br>(26.16<br>to<br>28.89) | 26.04<br>(24.72<br>to<br>27.35) | 26.77<br>(25.51<br>to<br>28.03) | 24.72<br>(22.58<br>to<br>26.85) | 23.49<br>(21.27<br>to<br>25.71) | <b>-1.759 (-2.108<br/>to -1.410)</b> | <b>-1.630 (-2.924<br/>to -0.335)</b> | 0.129 (-1.212<br>to 1.470)        | 0.90 (0.79<br>to 1.03)         | 0.94 (0.79<br>to 1.11) |
| Sex               |                                 |                                 |                                 |                                 |                                 |                                 |                                 |                                 |                                      |                                      |                                   |                                |                        |
| Male              | 4.38<br>(3.96<br>to<br>4.80)    | 5.81<br>(5.36<br>to<br>6.25)    | 4.52<br>(4.04<br>to<br>5.00)    | 3.55<br>(3.10<br>to<br>4.01)    | 4.02<br>(3.53<br>to<br>4.50)    | 3.93<br>(3.51<br>to<br>4.36)    | 4.08<br>(3.31<br>to<br>4.86)    | 4.74<br>(3.83<br>to<br>5.64)    | <b>-0.284 (-0.392<br/>to -0.175)</b> | 0.403 (-0.097<br>to 0.902)           | <b>0.686 (0.175<br/>to 1.197)</b> | 1.04 (0.83<br>to 1.31)         | 1.17 (0.88<br>to 1.55) |
| Female            | 13.75<br>(12.98)                | 16.83<br>(16.06)                | 15.57<br>(14.75)                | 14.39<br>(13.55)                | 14.17<br>(13.36)                | 15.10<br>(14.23)                | 13.71<br>(12.19)                | 13.77<br>(12.28)                | -0.158 (-0.360<br>to 0.044)          | -0.659 (-1.547<br>to 0.230)          | -0.501 (-1.412<br>to 0.410)       | 0.89 (0.77<br>to 1.04)         | 1.01 (0.83<br>to 1.22) |

|                     |                                 |                                 |                                 |                                 |                                 |                                 |                                |                                 |                                      |                             |                             |                        |                        |
|---------------------|---------------------------------|---------------------------------|---------------------------------|---------------------------------|---------------------------------|---------------------------------|--------------------------------|---------------------------------|--------------------------------------|-----------------------------|-----------------------------|------------------------|------------------------|
|                     | to<br>14.53)                    | to<br>17.60)                    | to<br>16.40)                    | to<br>15.23)                    | to<br>14.97)                    | to<br>15.97)                    | to<br>15.23)                   | to<br>15.27)                    |                                      |                             |                             |                        |                        |
| Region of residence |                                 |                                 |                                 |                                 |                                 |                                 |                                |                                 |                                      |                             |                             |                        |                        |
| Urban               | 7.20<br>(6.71<br>to<br>7.70)    | 9.80<br>(9.32<br>to<br>10.29)   | 9.09<br>(8.56<br>to<br>9.63)    | 8.23<br>(7.69<br>to<br>8.77)    | 8.58<br>(8.03<br>to<br>9.14)    | 8.84<br>(8.27<br>to<br>9.41)    | 8.68<br>(7.69<br>to<br>9.66)   | 8.49<br>(7.50<br>to<br>9.48)    | 0.020 (-0.112<br>to 0.153)           | -0.175 (-0.748<br>to 0.398) | -0.195 (-0.784<br>to 0.393) | 0.98 (0.85<br>to 1.14) | 0.98 (0.81<br>to 1.17) |
| Rural               | 18.16<br>(16.45<br>to<br>19.88) | 18.12<br>(16.40<br>to<br>19.84) | 14.12<br>(12.46<br>to<br>15.77) | 12.37<br>(10.83<br>to<br>13.91) | 11.87<br>(10.30<br>to<br>13.44) | 13.40<br>(11.60<br>to<br>15.21) | 10.19<br>(7.34<br>to<br>13.05) | 13.32<br>(10.61<br>to<br>16.02) | <b>-1.250 (-1.664<br/>to -0.835)</b> | 0.003 (-1.661<br>to 1.667)  | 1.252 (-0.462<br>to 2.967)  | 0.73 (0.52<br>to 1.04) | 1.35 (0.91<br>to 2.02) |
| BMI group           |                                 |                                 |                                 |                                 |                                 |                                 |                                |                                 |                                      |                             |                             |                        |                        |
| Underweight         | 4.62<br>(1.88                   | 7.68<br>(4.95                   | 3.67<br>(2.44                   | 3.22<br>(1.92                   | 4.87<br>(3.17                   | 4.86<br>(3.29                   | 3.49<br>(1.03                  | 4.78<br>(2.20                   | 0.012 (-0.482<br>to 0.507)           | -0.019 (-1.589<br>to 1.552) | -0.031 (-1.677<br>to 1.615) | 0.71 (0.32<br>to 1.56) | 1.39 (0.55<br>to 3.53) |

|                                   |                                 |                                 |                                 |                                 |                                 |                                 |                                 |                                 |                                      |                             |                                      |                        |                        |
|-----------------------------------|---------------------------------|---------------------------------|---------------------------------|---------------------------------|---------------------------------|---------------------------------|---------------------------------|---------------------------------|--------------------------------------|-----------------------------|--------------------------------------|------------------------|------------------------|
|                                   | to<br>7.36)                     | to<br>10.40)                    | to<br>4.90)                     | to<br>4.53)                     | to<br>6.58)                     | to<br>6.43)                     | to<br>5.95)                     | to<br>7.36)                     |                                      |                             |                                      |                        |                        |
| Normal weight<br>and overweight   | 10.11<br>(8.70<br>to<br>11.53)  | 10.45<br>(9.44<br>to<br>11.46)  | 8.55<br>(7.99<br>to<br>9.11)    | 8.01<br>(7.42<br>to<br>8.61)    | 7.70<br>(7.13<br>to<br>8.27)    | 8.53<br>(7.92<br>to<br>9.14)    | 8.29<br>(7.19<br>to<br>9.38)    | 8.24<br>(7.16<br>to<br>9.33)    | <b>-0.304 (-0.506<br/>to -0.102)</b> | -0.143 (-0.770<br>to 0.484) | 0.161 (-0.498<br>to 0.820)           | 0.97 (0.82<br>to 1.15) | 0.99 (0.80<br>to 1.23) |
| Obesity                           | 16.93<br>(14.99<br>to<br>18.87) | 17.23<br>(15.48<br>to<br>18.98) | 14.19<br>(13.19<br>to<br>15.18) | 11.92<br>(10.99<br>to<br>12.84) | 12.32<br>(11.38<br>to<br>13.25) | 11.78<br>(10.93<br>to<br>12.64) | 10.14<br>(8.66<br>to<br>11.61)  | 10.96<br>(9.43<br>to<br>12.49)  | <b>-1.005 (-1.315<br/>to -0.694)</b> | -0.392 (-1.298<br>to 0.515) | 0.613 (-0.345<br>to 1.571)           | 0.85 (0.71<br>to 1.01) | 1.09 (0.87<br>to 1.37) |
| Education                         |                                 |                                 |                                 |                                 |                                 |                                 |                                 |                                 |                                      |                             |                                      |                        |                        |
| High school or<br>lower education | 12.54<br>(11.86<br>to<br>13.21) | 16.26<br>(15.58<br>to<br>16.95) | 15.44<br>(14.68<br>to<br>16.20) | 15.06<br>(14.24<br>to<br>15.88) | 16.68<br>(15.76<br>to<br>17.60) | 17.86<br>(16.95<br>to<br>18.77) | 17.27<br>(15.71<br>to<br>18.84) | 16.33<br>(14.59<br>to<br>18.06) | <b>0.714 (0.518<br/>to 0.910)</b>    | -0.768 (-1.753<br>to 0.217) | <b>-1.482 (-2.486<br/>to -0.477)</b> | 0.96 (0.84<br>to 1.09) | 0.94 (0.79<br>to 1.11) |

|                                 |                                 |                                 |                                 |                                 |                                 |                                 |                                 |                                 |                                   |                                   |                            |                        |                        |
|---------------------------------|---------------------------------|---------------------------------|---------------------------------|---------------------------------|---------------------------------|---------------------------------|---------------------------------|---------------------------------|-----------------------------------|-----------------------------------|----------------------------|------------------------|------------------------|
| College or higher education     | 1.72<br>(1.40<br>to<br>2.04)    | 2.55<br>(2.22<br>to<br>2.89)    | 2.42<br>(2.01<br>to<br>2.83)    | 2.11<br>(1.70<br>to<br>2.51)    | 2.71<br>(2.33<br>to<br>3.10)    | 2.86<br>(2.49<br>to<br>3.23)    | 2.94<br>(2.21<br>to<br>3.66)    | 3.96<br>(3.19<br>to<br>4.74)    | <b>0.150 (0.057<br/>to 0.243)</b> | <b>0.556 (0.122<br/>to 0.990)</b> | 0.406 (-0.038<br>to 0.850) | 1.03 (0.77<br>to 1.37) | 1.36 (0.98<br>to 1.89) |
| Income                          |                                 |                                 |                                 |                                 |                                 |                                 |                                 |                                 |                                   |                                   |                            |                        |                        |
| Income (lowest-second quartile) | 13.80<br>(12.97<br>to<br>14.64) | 17.20<br>(16.37<br>to<br>18.03) | 14.63<br>(13.75<br>to<br>15.51) | 13.46<br>(12.60<br>to<br>14.33) | 14.18<br>(13.18<br>to<br>15.18) | 15.14<br>(14.20<br>to<br>16.08) | 14.44<br>(12.78<br>to<br>16.09) | 15.49<br>(13.66<br>to<br>17.32) | -0.165 (-0.385<br>to 0.054)       | 0.167 (-0.850<br>to 1.183)        | 0.332 (-0.708<br>to 1.372) | 0.95 (0.80<br>to 1.11) | 1.09 (0.89<br>to 1.33) |
| Income (third-highest quartile) | 5.26<br>(4.83<br>to<br>5.70)    | 6.80<br>(6.36<br>to<br>7.24)    | 6.78<br>(6.25<br>to<br>7.30)    | 5.68<br>(5.15<br>to<br>6.21)    | 5.83<br>(5.34<br>to<br>6.32)    | 5.81<br>(5.32<br>to<br>6.29)    | 5.64<br>(4.82<br>to<br>6.46)    | 5.64<br>(4.81<br>to<br>6.46)    | -0.111 (-0.228<br>to 0.007)       | -0.085 (-0.564<br>to 0.394)       | 0.026 (-0.467<br>to 0.519) | 0.97 (0.82<br>to 1.15) | 1.00 (0.81<br>to 1.24) |

Abbreviations: BMI, body mass index; CI, confidence interval; KNHANES, Korea National Health and Nutrition Examination Survey; OA, osteoarthritis; OR, odds ratio; RA, rheumatoid arthritis.



The numbers in bold indicate a significant difference ( $p < 0.05$ ).

**Table S3.** Differences in variables between pre-COVID19 pandemic and during COVID-19 pandemic by ratio of ORs among rheumatoid arthritis and osteoarthritis patients, weighted% (95% CI), in the data obtained from the KNHANES

| Variables |                     | Overall (1998-2021)           | Pre-COVID-19 pandemic<br>(1998- 2019) | COVID-19 pandemic (2020 and 2021) | Ratio of OR (95% CI)          |
|-----------|---------------------|-------------------------------|---------------------------------------|-----------------------------------|-------------------------------|
|           |                     | Weighted OR(95%CI)            | Weighted OR(95%CI)                    | Weighted OR(95%CI)                |                               |
| RA and OA |                     |                               |                                       |                                   |                               |
| Age       | 19-59               | 1.000 (reference)             | 1.000 (reference)                     | 1.000 (reference)                 | 1.000 (reference)             |
|           | ≥60                 | <b>8.306 (7.959 to 8.668)</b> | <b>8.317 (7.957 to 8.693)</b>         | <b>9.627 (8.148 to 11.375)</b>    | 1.158 (0.974 to 1.376)        |
| Sex       | Female              | 1.000 (reference)             | 1.000 (reference)                     | 1.000 (reference)                 | 1.000 (reference)             |
|           | Male                | <b>0.263 (0.251 to 0.274)</b> | <b>0.260 (0.248 to 0.272)</b>         | <b>0.294 (0.253 to 0.342)</b>     | 1.131 (0.966 to 1.324)        |
| Region    | Urban               | 1.000 (reference)             | 1.000 (reference)                     | 1.000 (reference)                 | 1.000 (reference)             |
|           | Rural               | <b>1.829 (1.716 to 1.949)</b> | <b>1.866 (1.747 to 1.994)</b>         | <b>1.492 (1.188 to 1.875)</b>     | 0.800 (0.631 to 1.015)        |
| Education | High school or less | 1.000 (reference)             | 1.000 (reference)                     | 1.000 (reference)                 | 1.000 (reference)             |
|           | College or more     | <b>0.132 (0.124 to 0.140)</b> | <b>0.126 (0.118 to 0.135)</b>         | <b>0.162 (0.137 to 0.192)</b>     | <b>1.286 (1.072 to 1.542)</b> |

|        |      |                               |                               |                               |                        |
|--------|------|-------------------------------|-------------------------------|-------------------------------|------------------------|
| Income | High | 1.000 (reference)             | 1.000 (reference)             | 1.000 (reference)             | 1.000 (reference)      |
|        | Low  | <b>2.692 (2.582 to 2.807)</b> | <b>2.669 (2.554 to 2.789)</b> | <b>2.935 (2.559 to 3.367)</b> | 1.100 (0.952 to 1.270) |

Abbreviations: CI, confidence interval; KNHANES, Korea National Health and Nutrition Examination Survey; OA, osteoarthritis; OR, odds ratio; RA, rheumatoid arthritis.

The numbers in bold indicate a significant difference ( $p < 0.05$ ).
